# Supplementary material
Source: PubMed Central journal article supplement (PMC4587283)
Supplement: NIHMS714372-supplement-01.pdf [file NIHMS714372-supplement-01.pdf]

Supplemental Table. Serious maternal complications and delivery route, by gestational age at delivery, in 698 cases excluded from main analysis due to non-reassuring fetal status, cord prolapse or an adverse placental condition (previa, accreta or abruption)

|                                          | 23-27 weeks<br>n=171                                 |                                      | 28-31 weeks<br>n=288                                  |                                       | 32-33 weeks<br>n=239                                  |                                       |
|------------------------------------------|------------------------------------------------------|--------------------------------------|-------------------------------------------------------|---------------------------------------|-------------------------------------------------------|---------------------------------------|
| Outcome , n (%)*                         | Non-reassuring fetal status or cord prolapse<br>n=85 | Adverse placental condition†<br>n=86 | Non-reassuring fetal status or cord prolapse<br>n=167 | Adverse placental condition†<br>n=121 | Non-reassuring fetal status or cord prolapse<br>n=122 | Adverse placental condition†<br>n=117 |
| Composite serious maternal complications | 15 (18.1)                                            | 22 (25.9)                            | 20 (12.1)                                             | 38 (31.4)                             | 5 (4.1)                                               | 41 (35.0)                             |
| Hemorrhage                               | 8 (9.6)                                              | 21 (24.7)                            | 11 (6.7)                                              | 30 (24.8)                             | 4 (3.3)                                               | 41 (35.0)                             |
| Infection                                | 3 (3.5)                                              | 2 (2.3)                              | 8 (4.8)                                               | 5 (4.1)                               | 0 (0.0)                                               | 4 (3.4)                               |
| ICU admission                            | 6 (7.1)                                              | 3 (3.5)                              | 8 (4.8)                                               | 7 (5.8)                               | 2 (1.6)                                               | 6 (5.1)                               |
| Death                                    | 0 (0.0)                                              | 0 (0.0)                              | 1 (0.6)                                               | 0 (0.0)                               | 0 (0.0)                                               | 0 (0.0)                               |
| Delivery route                           |                                                      |                                      |                                                       |                                       |                                                       |                                       |
| Classical cesarean                       | 46 (55.4)                                            | 26 (30.6)                            | 36 (21.6)                                             | 21 (17.5)                             | 2 (1.6)                                               | 17 (14.7)                             |
| Low transverse cesarean                  | 33 (39.8)                                            | 31 (36.5)                            | 113 (67.7)                                            | 75 (62.5)                             | 97 (79.5)                                             | 71 (61.2)                             |
| Low vertical cesarean                    | 1 (1.2)                                              | 0 (0.0)                              | 4 (2.4)                                               | 2 (1.7)                               | 1 (0.8)                                               | 2 (1.7)                               |
| Vaginal                                  | 3 (3.6)                                              | 28 (32.9)                            | 14 (8.4)                                              | 22 (18.3)                             | 22 (18.0)                                             | 26 (22.4)                             |

\*all 698 women had complete data to define the outcomes of infection, ICU admission, and death; 5 had missing data to define hemorrhage; 5 had missing data to define MM  
† previa, accreta or abruption
